# Supplementary material
Source: HighWire-hosted journal article supplement (https://bmjopen.bmj.com/content/14/11/e089623)
Supplement: inline-supplementary-material-2 [file inline-supplementary-material-2.pdf]

Search Strategy

Database Host: Ovid

Database: PsycINFO

Date: 2.2.2022

Results: 2676

Limits: English, German, French, Spanish Language; Publication Year: no limit, Document Type: articles, conference proceedings

| Concept 1                                                                                                                                        | Concept 2                                                                                                                                                                                                                                        | Concept 3                                                                                         | Concept 4                                                                                                                                                                  | Concept 5                                                                                                                                                                                                                                                                                                                                                                                                                                                                                                                                                                                                                                                                                                                                                                                                                                                                                                                                                                                                                                                                                                                                                                                                                                                         |
|--------------------------------------------------------------------------------------------------------------------------------------------------|--------------------------------------------------------------------------------------------------------------------------------------------------------------------------------------------------------------------------------------------------|---------------------------------------------------------------------------------------------------|----------------------------------------------------------------------------------------------------------------------------------------------------------------------------|-------------------------------------------------------------------------------------------------------------------------------------------------------------------------------------------------------------------------------------------------------------------------------------------------------------------------------------------------------------------------------------------------------------------------------------------------------------------------------------------------------------------------------------------------------------------------------------------------------------------------------------------------------------------------------------------------------------------------------------------------------------------------------------------------------------------------------------------------------------------------------------------------------------------------------------------------------------------------------------------------------------------------------------------------------------------------------------------------------------------------------------------------------------------------------------------------------------------------------------------------------------------|
| Population                                                                                                                                       | Maltreatment                                                                                                                                                                                                                                     | Psychometric Properties                                                                           | Measurement                                                                                                                                                                | Entire Search Term                                                                                                                                                                                                                                                                                                                                                                                                                                                                                                                                                                                                                                                                                                                                                                                                                                                                                                                                                                                                                                                                                                                                                                                                                                                |
| child* OR infan* OR adolescen* OR teen* OR youth* OR pediatri* OR paediatric* OR young* OR baby OR babies OR toddler* OR minor* OR girl* OR boy* | abus* OR maltreat* OR "ill-treatm*" OR "ill treatm*" OR neglect* OR "exposure to intimate partner violence" OR "exposure to domestic violence" OR mistreat* OR assault* OR molest* OR "forced sex" OR "coerced sex" OR "unwanted sex" OR "forced | valid* OR reliab* OR psychometric* OR accura* OR "sensitivity" OR "specificity" OR "ROC" OR "AUC" | instrument* OR scor* OR screen* OR scal* OR question* OR report* OR measur* OR inventor* OR interview* OR survey* OR test* OR construct* OR evaluat* OR analys* OR assess* | (((((child* or infan* or adolescen* or teen* or youth* or pediatri* or paediatric* or young* or baby or babies or toddler* or minor* or girl* or boy*) adj4 (abus* or maltreat* or "ill-treatm*" or "ill treatm*" or neglect* or "exposure to intimate partner violence" or "exposure to domestic violence" or mistreat* or assault* or molest* or "forced sex" or "coerced sex" or "unwanted sex" or "forced intercourse" or "unwanted intercourse" or "forced penetration" or "unwanted penetration" or rape or "sexual violence" or "unwanted touching" or "forced touching" or "sexual harrassment" or "physical harm" or "corporal punishment" or "physical punishment")) and (instrument* or scor* or screen* or scal* or question* or report* or measur* or inventor* or interview* or survey* or test* or construct* or evaluat* or analys* or assess*) and (valid* or reliab* or psychometric* or accura* or "sensitivity" or "specificity" or "ROC" or "AUC")) not ("substance abuse" or "substance misuse" or "alcohol abuse" or "alcohol misuse" or "drug abuse" or "drug misuse"))).ti. or (((child* or infan* or adolescen* or teen* or youth* or pediatri* or paediatric* or young* or baby or babies or toddler* or minor* or girl* or boy*) adj4 |

|  |                                                                                                                                                                                                                                                                                                                      |  |  |                                                                                                                                                                                                                                                                                                                                                                                                                                                                                                                                                                                                                                                                                                                                                                                                                                                                                                                                                                                                                                                                                                                                                                                                                                                                                                                                                                                                                                                                                                                                                                                                                                                                                                                                                                                                                                                                                                                                                                                                                                            |
|--|----------------------------------------------------------------------------------------------------------------------------------------------------------------------------------------------------------------------------------------------------------------------------------------------------------------------|--|--|--------------------------------------------------------------------------------------------------------------------------------------------------------------------------------------------------------------------------------------------------------------------------------------------------------------------------------------------------------------------------------------------------------------------------------------------------------------------------------------------------------------------------------------------------------------------------------------------------------------------------------------------------------------------------------------------------------------------------------------------------------------------------------------------------------------------------------------------------------------------------------------------------------------------------------------------------------------------------------------------------------------------------------------------------------------------------------------------------------------------------------------------------------------------------------------------------------------------------------------------------------------------------------------------------------------------------------------------------------------------------------------------------------------------------------------------------------------------------------------------------------------------------------------------------------------------------------------------------------------------------------------------------------------------------------------------------------------------------------------------------------------------------------------------------------------------------------------------------------------------------------------------------------------------------------------------------------------------------------------------------------------------------------------------|
|  | intercourse" OR<br>"unwanted<br>intercourse" OR<br>"forced<br>penetration" OR<br>"unwanted<br>penetration" OR<br>rape OR "sexual<br>violence" OR<br>"unwanted<br>touching" OR<br>"forced touching"<br>OR "sexual<br>harrassment" OR<br>"physical harm"<br>OR "corporal<br>punishment" OR<br>"physical<br>punishment" |  |  | (abus* or maltreat* or "ill-treatm*" or "ill treatm*" or neglect* or "exposure to intimate partner violence" or "exposure to domestic violence" or mistreat* or assault* or molest* or "forced sex" or "coerced sex" or "unwanted sex" or "forced intercourse" or "unwanted intercourse" or "forced penetration" or "unwanted penetration" or rape or "sexual violence" or "unwanted touching" or "forced touching" or "sexual harrassment" or "physical harm" or "corporal punishment" or "physical punishment")) and (instrument* or scor* or screen* or scal* or question* or report* or measur* or inventor* or interview* or survey* or test* or construct* or evaluat* or analys* or assess*) and (valid* or reliab* or psychometric* or accura* or "sensitivity" or "specificity" or "ROC" or "AUC")) not ("substance abuse" or "substance misuse" or "alcohol abuse" or "alcohol misuse" or "drug abuse" or "drug misuse")).ab. or (((child* or infan* or adolescen* or teen* or youth* or pediater* or paediatr* or young* or baby or babies or toddler* or minor* or girl* or boy*) adj4 (abus* or maltreat* or "ill-treatm*" or "ill treatm*" or neglect* or "exposure to intimate partner violence" or "exposure to domestic violence" or mistreat* or assault* or molest* or "forced sex" or "coerced sex" or "unwanted sex" or "forced intercourse" or "unwanted intercourse" or "forced penetration" or "unwanted penetration" or rape or "sexual violence" or "unwanted touching" or "forced touching" or "sexual harrassment" or "physical harm" or "corporal punishment" or "physical punishment")) and (instrument* or scor* or screen* or scal* or question* or report* or measur* or inventor* or interview* or survey* or test* or construct* or evaluat* or analys* or assess*) and (valid* or reliab* or psychometric* or accura* or "sensitivity" or "specificity" or "ROC" or "AUC")) not ("substance abuse" or "substance misuse" or "alcohol abuse" or "alcohol misuse" or "drug abuse" or "drug misuse")).id. |
|--|----------------------------------------------------------------------------------------------------------------------------------------------------------------------------------------------------------------------------------------------------------------------------------------------------------------------|--|--|--------------------------------------------------------------------------------------------------------------------------------------------------------------------------------------------------------------------------------------------------------------------------------------------------------------------------------------------------------------------------------------------------------------------------------------------------------------------------------------------------------------------------------------------------------------------------------------------------------------------------------------------------------------------------------------------------------------------------------------------------------------------------------------------------------------------------------------------------------------------------------------------------------------------------------------------------------------------------------------------------------------------------------------------------------------------------------------------------------------------------------------------------------------------------------------------------------------------------------------------------------------------------------------------------------------------------------------------------------------------------------------------------------------------------------------------------------------------------------------------------------------------------------------------------------------------------------------------------------------------------------------------------------------------------------------------------------------------------------------------------------------------------------------------------------------------------------------------------------------------------------------------------------------------------------------------------------------------------------------------------------------------------------------------|

**Database Host:** Ovid

**Database:** Medline

**Date:** 2.2.2022

**Results:** 2661

**Limits:** English, German, French, Spanish Language; Publication Year: no limit, Document Type: articles, conference proceedings

| Concept 1                                                                                                                                        | Concept 2                                                                                                                                                                                                                                                                        | Concept 3                                                                                           | Concept 4                                                                                                                                                                  | Concept 5                                                                                                                                                                                                                                                                                                                                                                                                                                                                                                                                                                                                                                                                                                                                                                                                                                                                                                                                                                                                                                                                                                                                                                                                                                                                                                                                                                                                            |
|--------------------------------------------------------------------------------------------------------------------------------------------------|----------------------------------------------------------------------------------------------------------------------------------------------------------------------------------------------------------------------------------------------------------------------------------|-----------------------------------------------------------------------------------------------------|----------------------------------------------------------------------------------------------------------------------------------------------------------------------------|----------------------------------------------------------------------------------------------------------------------------------------------------------------------------------------------------------------------------------------------------------------------------------------------------------------------------------------------------------------------------------------------------------------------------------------------------------------------------------------------------------------------------------------------------------------------------------------------------------------------------------------------------------------------------------------------------------------------------------------------------------------------------------------------------------------------------------------------------------------------------------------------------------------------------------------------------------------------------------------------------------------------------------------------------------------------------------------------------------------------------------------------------------------------------------------------------------------------------------------------------------------------------------------------------------------------------------------------------------------------------------------------------------------------|
| Population                                                                                                                                       | Maltreatment                                                                                                                                                                                                                                                                     | Psychometric Properties                                                                             | Measurement                                                                                                                                                                | Entire Search Term                                                                                                                                                                                                                                                                                                                                                                                                                                                                                                                                                                                                                                                                                                                                                                                                                                                                                                                                                                                                                                                                                                                                                                                                                                                                                                                                                                                                   |
| child* OR infan* OR adolescen* OR teen* OR youth* OR pediater* OR paediatric* OR young* OR baby OR babies OR toddler* OR minor* OR girl* OR boy* | abus* OR maltreat* OR "ill-treatment*" OR "ill treatment*" OR neglect* OR "exposure to intimate partner violence" OR "exposure to domestic violence" OR mistreat* OR assault* OR molest* OR "forced sex" OR "coerced sex" OR "unwanted sex" OR "forced intercourse" OR "unwanted | valid* OR reliab* OR psychometric* OR accurate* OR "sensitivity" OR "specificity" OR "ROC" OR "AUC" | instrument* OR scor* OR screen* OR scal* OR question* OR report* OR measur* OR inventor* OR interview* OR survey* OR test* OR construct* OR evaluat* OR analys* OR assess* | (((((child* or infan* or adolescen* or teen* or youth* or pediater* or paediatric* or young* or baby or babies or toddler* or minor* or girl* or boy*) adj4 (abus* or maltreat* or "ill-treatment*" or "ill treatment*" or neglect* or "exposure to intimate partner violence" or "exposure to domestic violence" or mistreat* or assault* or molest* or "forced sex" or "coerced sex" or "unwanted sex" or "forced intercourse" or "unwanted intercourse" or "forced penetration" or "unwanted penetration" or rape or "sexual violence" or "unwanted touching" or "forced touching" or "sexual harrassment" or "physical harm" or "corporal punishment" or "physical punishment")) and (instrument* or scor* or screen* or scal* or question* or report* or measur* or inventor* or interview* or survey* or test* or construct* or evaluat* or analys* or assess*) and (valid* or reliab* or psychometric* or accurate* or "sensitivity" or "specificity" or "ROC" or "AUC")) not ("substance abuse" or "substance misuse" or "alcohol abuse" or "alcohol misuse" or "drug abuse" or "drug misuse")).ti. or (((child* or infan* or adolescen* or teen* or youth* or pediater* or paediatric* or young* or baby or babies or toddler* or minor* or girl* or boy*) adj4 (abus* or maltreat* or "ill-treatment*" or "ill treatment*" or neglect* or "exposure to intimate partner violence" or "exposure to domestic |

|  |                                                                                                                                                                                                                                      |  |  |                                                                                                                                                                                                                                                                                                                                                                                                                                                                                                                                                                                                                                                                                                                                                                                                                                                                                                                                                                                                                                                                                                                                                                                                                                                                                                                                                                                                                                                                                                                                                                                                                                                                                                                                                                                                                                                                                                     |
|--|--------------------------------------------------------------------------------------------------------------------------------------------------------------------------------------------------------------------------------------|--|--|-----------------------------------------------------------------------------------------------------------------------------------------------------------------------------------------------------------------------------------------------------------------------------------------------------------------------------------------------------------------------------------------------------------------------------------------------------------------------------------------------------------------------------------------------------------------------------------------------------------------------------------------------------------------------------------------------------------------------------------------------------------------------------------------------------------------------------------------------------------------------------------------------------------------------------------------------------------------------------------------------------------------------------------------------------------------------------------------------------------------------------------------------------------------------------------------------------------------------------------------------------------------------------------------------------------------------------------------------------------------------------------------------------------------------------------------------------------------------------------------------------------------------------------------------------------------------------------------------------------------------------------------------------------------------------------------------------------------------------------------------------------------------------------------------------------------------------------------------------------------------------------------------------|
|  | intercourse" OR "forced penetration" OR "unwanted penetration" OR rape OR "sexual violence" OR "unwanted touching" OR "forced touching" OR "sexual harrassment" OR "physical harm" OR "corporal punishment" OR "physical punishment" |  |  | violence" or mistreat* or assault* or molest* or "forced sex" or "coerced sex" or "unwanted sex" or "forced intercourse" or "unwanted intercourse" or "forced penetration" or "unwanted penetration" or rape or "sexual violence" or "unwanted touching" or "forced touching" or "sexual harrassment" or "physical harm" or "corporal punishment" or "physical punishment")) and (instrument* or scor* or screen* or scal* or question* or report* or measur* or inventor* or interview* or survey* or test* or construct* or evaluat* or analys* or assess*) and (valid* or reliab* or psychometric* or accura* or "sensitivity" or "specificity" or "ROC" or "AUC")) not ("substance abuse" or "substance misuse" or "alcohol abuse" or "alcohol misuse" or "drug abuse" or "drug misuse")).ab. or (((child* or infan* or adolescen* or teen* or youth* or pедиatr* or paediatr* or young* or baby or babies or toddler* or minor* or girl* or boy*) adj4 (abus* or maltreat* or "ill-treatm*" or "ill treatm*" or neglect* or "exposure to intimate partner violence" or "exposure to domestic violence" or mistreat* or assault* or molest* or "forced sex" or "coerced sex" or "unwanted sex" or "forced intercourse" or "unwanted intercourse" or "forced penetration" or "unwanted penetration" or rape or "sexual violence" or "unwanted touching" or "forced touching" or "sexual harrassment" or "physical harm" or "corporal punishment" or "physical punishment")) and (instrument* or scor* or screen* or scal* or question* or report* or measur* or inventor* or interview* or survey* or test* or construct* or evaluat* or analys* or assess*) and (valid* or reliab* or psychometric* or accura* or "sensitivity" or "specificity" or "ROC" or "AUC")) not ("substance abuse" or "substance misuse" or "alcohol abuse" or "alcohol misuse" or "drug abuse" or "drug misuse")).kw. |
|--|--------------------------------------------------------------------------------------------------------------------------------------------------------------------------------------------------------------------------------------|--|--|-----------------------------------------------------------------------------------------------------------------------------------------------------------------------------------------------------------------------------------------------------------------------------------------------------------------------------------------------------------------------------------------------------------------------------------------------------------------------------------------------------------------------------------------------------------------------------------------------------------------------------------------------------------------------------------------------------------------------------------------------------------------------------------------------------------------------------------------------------------------------------------------------------------------------------------------------------------------------------------------------------------------------------------------------------------------------------------------------------------------------------------------------------------------------------------------------------------------------------------------------------------------------------------------------------------------------------------------------------------------------------------------------------------------------------------------------------------------------------------------------------------------------------------------------------------------------------------------------------------------------------------------------------------------------------------------------------------------------------------------------------------------------------------------------------------------------------------------------------------------------------------------------------|

**Database:** Scopus

**Date:** 2.2.2022

**Results:** 5523

**Limits:** English, German, French, Spanish Language; Publication Year: no limit, Document Type: articles, conference proceedings

| Concept 1                                                                                                                                        | Concept 2                                                                                                                                                                                                                                                                                                | Concept 3                                                                                           | Concept 4                                                                                                                                                                        | Concept 5                                                                                                                                                                                                                                                                                                                                                                                                                                                                                                                                                                                                                                                                                                                                                                                                                                                                                                                                                                                                                                                                                                                                                                                                                                                                                                                                                          |
|--------------------------------------------------------------------------------------------------------------------------------------------------|----------------------------------------------------------------------------------------------------------------------------------------------------------------------------------------------------------------------------------------------------------------------------------------------------------|-----------------------------------------------------------------------------------------------------|----------------------------------------------------------------------------------------------------------------------------------------------------------------------------------|--------------------------------------------------------------------------------------------------------------------------------------------------------------------------------------------------------------------------------------------------------------------------------------------------------------------------------------------------------------------------------------------------------------------------------------------------------------------------------------------------------------------------------------------------------------------------------------------------------------------------------------------------------------------------------------------------------------------------------------------------------------------------------------------------------------------------------------------------------------------------------------------------------------------------------------------------------------------------------------------------------------------------------------------------------------------------------------------------------------------------------------------------------------------------------------------------------------------------------------------------------------------------------------------------------------------------------------------------------------------|
| Population                                                                                                                                       | Maltreatment                                                                                                                                                                                                                                                                                             | Psychometric Properties                                                                             | Measurement                                                                                                                                                                      | Entire Search Term                                                                                                                                                                                                                                                                                                                                                                                                                                                                                                                                                                                                                                                                                                                                                                                                                                                                                                                                                                                                                                                                                                                                                                                                                                                                                                                                                 |
| child* OR infan* OR adolescen* OR teen* OR youth* OR pediater* OR paediatric* OR young* OR baby OR babies OR toddler* OR minor* OR girl* OR boy* | abus* OR maltreat* OR "ill-treatment*" OR "ill treatment*" OR neglect* OR "exposure to intimate partner violence" OR "exposure to domestic violence" OR mistreat* OR assault* OR molest* OR "forced sex" OR "coerced sex" OR "unwanted sex" OR "forced intercourse" OR "unwanted intercourse" OR "forced | valid* OR reliab* OR psychometric* OR accurate* OR "sensitivity" OR "specificity" OR "ROC" OR "AUC" | instrument* OR score* OR screen* OR scale* OR question* OR report* OR measure* OR inventor* OR interview* OR survey* OR test* OR construct* OR evaluate* OR analysis* OR assess* | TITLE-ABS-KEY ( ( ( child* OR infan* OR adolescen* OR teen* OR youth* OR pediater* OR paediatric* OR young* OR baby OR babies OR toddler* OR minor* OR girl* OR boy* ) W/4 ( abus* OR maltreat* OR "ill-treatment*" OR "ill treatment*" OR neglect* OR "exposure to intimate partner violence" OR "exposure to domestic violence" OR mistreat* OR assault* OR molest* OR "forced sex" OR "coerced sex" OR "unwanted sex" OR "forced intercourse" OR "unwanted intercourse" OR "forced penetration" OR "unwanted penetration" OR rape OR "sexual violence" OR "unwanted touching" OR "forced touching" OR "sexual harassment" OR "physical harm" OR "corporal punishment" OR "physical punishment" ) ) AND ( instrument* OR score* OR screen* OR scale* OR question* OR report* OR measure* OR inventor* OR interview* OR survey* OR test* OR construct* OR evaluate* OR analysis* OR assess* ) AND ( valid* OR reliab* OR psychometric* OR accurate* OR "sensitivity" OR "specificity" OR "ROC" OR "AUC" ) AND NOT ( "substance abuse" OR "substance misuse" OR "alcohol abuse" OR "alcohol misuse" OR "drug abuse" OR "drug misuse" ) ) AND ( LIMIT-TO ( LANGUAGE , "English" ) OR LIMIT-TO ( LANGUAGE , "German" ) OR LIMIT-TO ( LANGUAGE , "French" ) OR LIMIT-TO ( LANGUAGE , "Spanish" ) ) AND ( LIMIT-TO ( DOCTYPE , "ar" ) OR LIMIT-TO ( DOCTYPE , "cp" ) ) |

|  |                                                                                                                                                                                                                                                        |  |  |  |
|--|--------------------------------------------------------------------------------------------------------------------------------------------------------------------------------------------------------------------------------------------------------|--|--|--|
|  | penetration" OR<br>"unwanted<br>penetration" OR<br>rape OR "sexual<br>violence" OR<br>"unwanted<br>touching" OR<br>"forced touching"<br>OR "sexual<br>harrassment" OR<br>"physical harm"<br>OR "corporal<br>punishment" OR<br>"physical<br>punishment" |  |  |  |
|--|--------------------------------------------------------------------------------------------------------------------------------------------------------------------------------------------------------------------------------------------------------|--|--|--|

**Database:** Web of Science

**Date:** 2.2.2022

**Results:** 2939

**Limits:** English, German, French, Spanish Language; Publication Year: no limit, Document Type: articles, conference proceedings

| Concept 1                                                                                                                                        | Concept 2                                                                                                                                                                                                                                                                                                | Concept 3                                                                                          | Concept 4                                                                                                                                                                  | Concept 5                                                                                                                                                                                                                                                                                                                                                                                                                                                                                                                                                                                                                                                                                                                                                                                                                                                                                                                                                                                                                                                                                                                                                                                                                                                                                                                                                                              |
|--------------------------------------------------------------------------------------------------------------------------------------------------|----------------------------------------------------------------------------------------------------------------------------------------------------------------------------------------------------------------------------------------------------------------------------------------------------------|----------------------------------------------------------------------------------------------------|----------------------------------------------------------------------------------------------------------------------------------------------------------------------------|----------------------------------------------------------------------------------------------------------------------------------------------------------------------------------------------------------------------------------------------------------------------------------------------------------------------------------------------------------------------------------------------------------------------------------------------------------------------------------------------------------------------------------------------------------------------------------------------------------------------------------------------------------------------------------------------------------------------------------------------------------------------------------------------------------------------------------------------------------------------------------------------------------------------------------------------------------------------------------------------------------------------------------------------------------------------------------------------------------------------------------------------------------------------------------------------------------------------------------------------------------------------------------------------------------------------------------------------------------------------------------------|
| Population                                                                                                                                       | Maltreatment                                                                                                                                                                                                                                                                                             | Psychometric Properties                                                                            | Measurement                                                                                                                                                                | Entire Search Term                                                                                                                                                                                                                                                                                                                                                                                                                                                                                                                                                                                                                                                                                                                                                                                                                                                                                                                                                                                                                                                                                                                                                                                                                                                                                                                                                                     |
| child* OR infan* OR adolescen* OR teen* OR youth* OR pediater* OR paediatric* OR young* OR baby OR babies OR toddler* OR minor* OR girl* OR boy* | abus* OR maltreat* OR "ill-treatment*" OR "ill treatment*" OR neglect* OR "exposure to intimate partner violence" OR "exposure to domestic violence" OR mistreat* OR assault* OR molest* OR "forced sex" OR "coerced sex" OR "unwanted sex" OR "forced intercourse" OR "unwanted intercourse" OR "forced | valid* OR reliab* OR psychometric* OR accurat* OR "sensitivity" OR "specificity" OR "ROC" OR "AUC" | instrument* OR scor* OR screen* OR scal* OR question* OR report* OR measur* OR inventor* OR interview* OR survey* OR test* OR construct* OR evaluat* OR analys* OR assess* | ((TI=(((child* OR infan* OR adolescen* OR teen* OR youth* OR pediater* OR paediatric* OR young* OR baby OR babies OR toddler* OR minor* OR girl* OR boy*) NEAR/4 (abus* OR maltreat* OR "ill-treatment*" OR "ill treatment*" OR neglect* OR "exposure to intimate partner violence" OR "exposure to domestic violence" OR mistreat* OR assault* OR molest* OR "forced sex" OR "coerced sex" OR "unwanted sex" OR "forced intercourse" OR "unwanted intercourse" OR "sexual violence" OR "unwanted touching" OR "forced touching" OR "sexual harassment" OR "physical harm" OR "corporal punishment" OR "physical punishment")) AND (instrument* OR scor* OR screen* OR scal* OR question* OR report* OR measur* OR inventor* OR interview* OR survey* OR test* OR construct* OR evaluat* OR analys* OR assess*) AND (valid* OR reliab* OR psychometric* OR accurat* OR "sensitivity" OR "specificity" OR "ROC" OR "AUC") NOT ("substance abuse" OR "substance misuse" OR "alcohol abuse" OR "alcohol misuse" OR "drug abuse" OR "drug misuse")))) OR AB=(((child* OR infan* OR adolescen* OR teen* OR youth* OR pediater* OR paediatric* OR young* OR baby OR babies OR toddler* OR minor* OR girl* OR boy*) NEAR/4 (abus* OR maltreat* OR "ill-treatment*" OR "ill treatment*" OR neglect* OR "exposure to intimate partner violence" OR "exposure to domestic violence" OR mistreat* |

|  |                                                                                                                                                                                                              |  |  |                                                                                                                                                                                                                                                                                                                                                                                                                                                                                                                                                                                                                                                                                                                                                                                                                                                                                                                                                                                                                                                                                                                                                                                                                                                                                                                                                                                                                                                                                                                                                                                                                                                                                                                                                                                                                                                                                                                                                                                               |
|--|--------------------------------------------------------------------------------------------------------------------------------------------------------------------------------------------------------------|--|--|-----------------------------------------------------------------------------------------------------------------------------------------------------------------------------------------------------------------------------------------------------------------------------------------------------------------------------------------------------------------------------------------------------------------------------------------------------------------------------------------------------------------------------------------------------------------------------------------------------------------------------------------------------------------------------------------------------------------------------------------------------------------------------------------------------------------------------------------------------------------------------------------------------------------------------------------------------------------------------------------------------------------------------------------------------------------------------------------------------------------------------------------------------------------------------------------------------------------------------------------------------------------------------------------------------------------------------------------------------------------------------------------------------------------------------------------------------------------------------------------------------------------------------------------------------------------------------------------------------------------------------------------------------------------------------------------------------------------------------------------------------------------------------------------------------------------------------------------------------------------------------------------------------------------------------------------------------------------------------------------------|
|  | penetration" OR "unwanted penetration" OR rape OR "sexual violence" OR "unwanted touching" OR "forced touching" OR "sexual harrassment" OR "physical harm" OR "corporal punishment" OR "physical punishment" |  |  | OR assault* OR molest* OR "forced sex" OR "coerced sex" OR "unwanted sex" OR "forced intercourse" OR "unwanted intercourse" OR "forced penetration" OR "unwanted penetration" OR rape OR "sexual violence" OR "unwanted touching" OR "forced touching" OR "sexual harrassment" OR "physical harm" OR "corporal punishment" OR "physical punishment")) AND (instrument* OR scor* OR screen* OR scal* OR question* OR report* OR measur* OR inventor* OR interview* OR survey* OR test* OR construct* OR evaluat* OR analys* OR assess*) AND (valid* OR reliab* OR psychometric* OR accura* OR "sensitivity" OR "specificity" OR "ROC" OR "AUC") NOT ("substance abuse" OR "substance misuse" OR "alcohol abuse" OR "alcohol misuse" OR "drug abuse" OR "drug misuse")))) OR AK=(((child* OR infan* OR adolescen* OR teen* OR youth* OR pediatri* OR paediatric* OR young* OR baby OR babies OR toddler* OR minor* OR girl* OR boy*) NEAR/4 (abus* OR maltreat* OR "ill-treatment*" OR "ill treatment*" OR neglect* OR "exposure to intimate partner violence" OR "exposure to domestic violence" OR mistreat* OR assault* OR molest* OR "forced sex" OR "coerced sex" OR "unwanted sex" OR "forced intercourse" OR "unwanted intercourse" OR "forced penetration" OR "unwanted penetration" OR rape OR "sexual violence" OR "unwanted touching" OR "forced touching" OR "sexual harrassment" OR "physical harm" OR "corporal punishment" OR "physical punishment")) AND (instrument* OR scor* OR screen* OR scal* OR question* OR report* OR measur* OR inventor* OR interview* OR survey* OR test* OR construct* OR evaluat* OR analys* OR assess*) AND (valid* OR reliab* OR psychometric* OR accura* OR "sensitivity" OR "specificity" OR "ROC" OR "AUC") NOT ("substance abuse" OR "substance misuse" OR "alcohol abuse" OR "alcohol misuse" OR "drug abuse" OR "drug misuse")) and English or Spanish or German or French (Languages) and Articles or Proceedings Papers (Document Types) |
|--|--------------------------------------------------------------------------------------------------------------------------------------------------------------------------------------------------------------|--|--|-----------------------------------------------------------------------------------------------------------------------------------------------------------------------------------------------------------------------------------------------------------------------------------------------------------------------------------------------------------------------------------------------------------------------------------------------------------------------------------------------------------------------------------------------------------------------------------------------------------------------------------------------------------------------------------------------------------------------------------------------------------------------------------------------------------------------------------------------------------------------------------------------------------------------------------------------------------------------------------------------------------------------------------------------------------------------------------------------------------------------------------------------------------------------------------------------------------------------------------------------------------------------------------------------------------------------------------------------------------------------------------------------------------------------------------------------------------------------------------------------------------------------------------------------------------------------------------------------------------------------------------------------------------------------------------------------------------------------------------------------------------------------------------------------------------------------------------------------------------------------------------------------------------------------------------------------------------------------------------------------|
